# Supplementary figures and images for: Dinoflagellate Phosphopantetheinyl Transferase (PPTase) and Thiolation Domain Interactions Characterized Using a Modified Indigoidine Synthesizing Reporter
Source: MDPI journal article supplement (doi:10.3390/microorganisms10040687), 2022-03-23

# PCPS Indigoidine Production

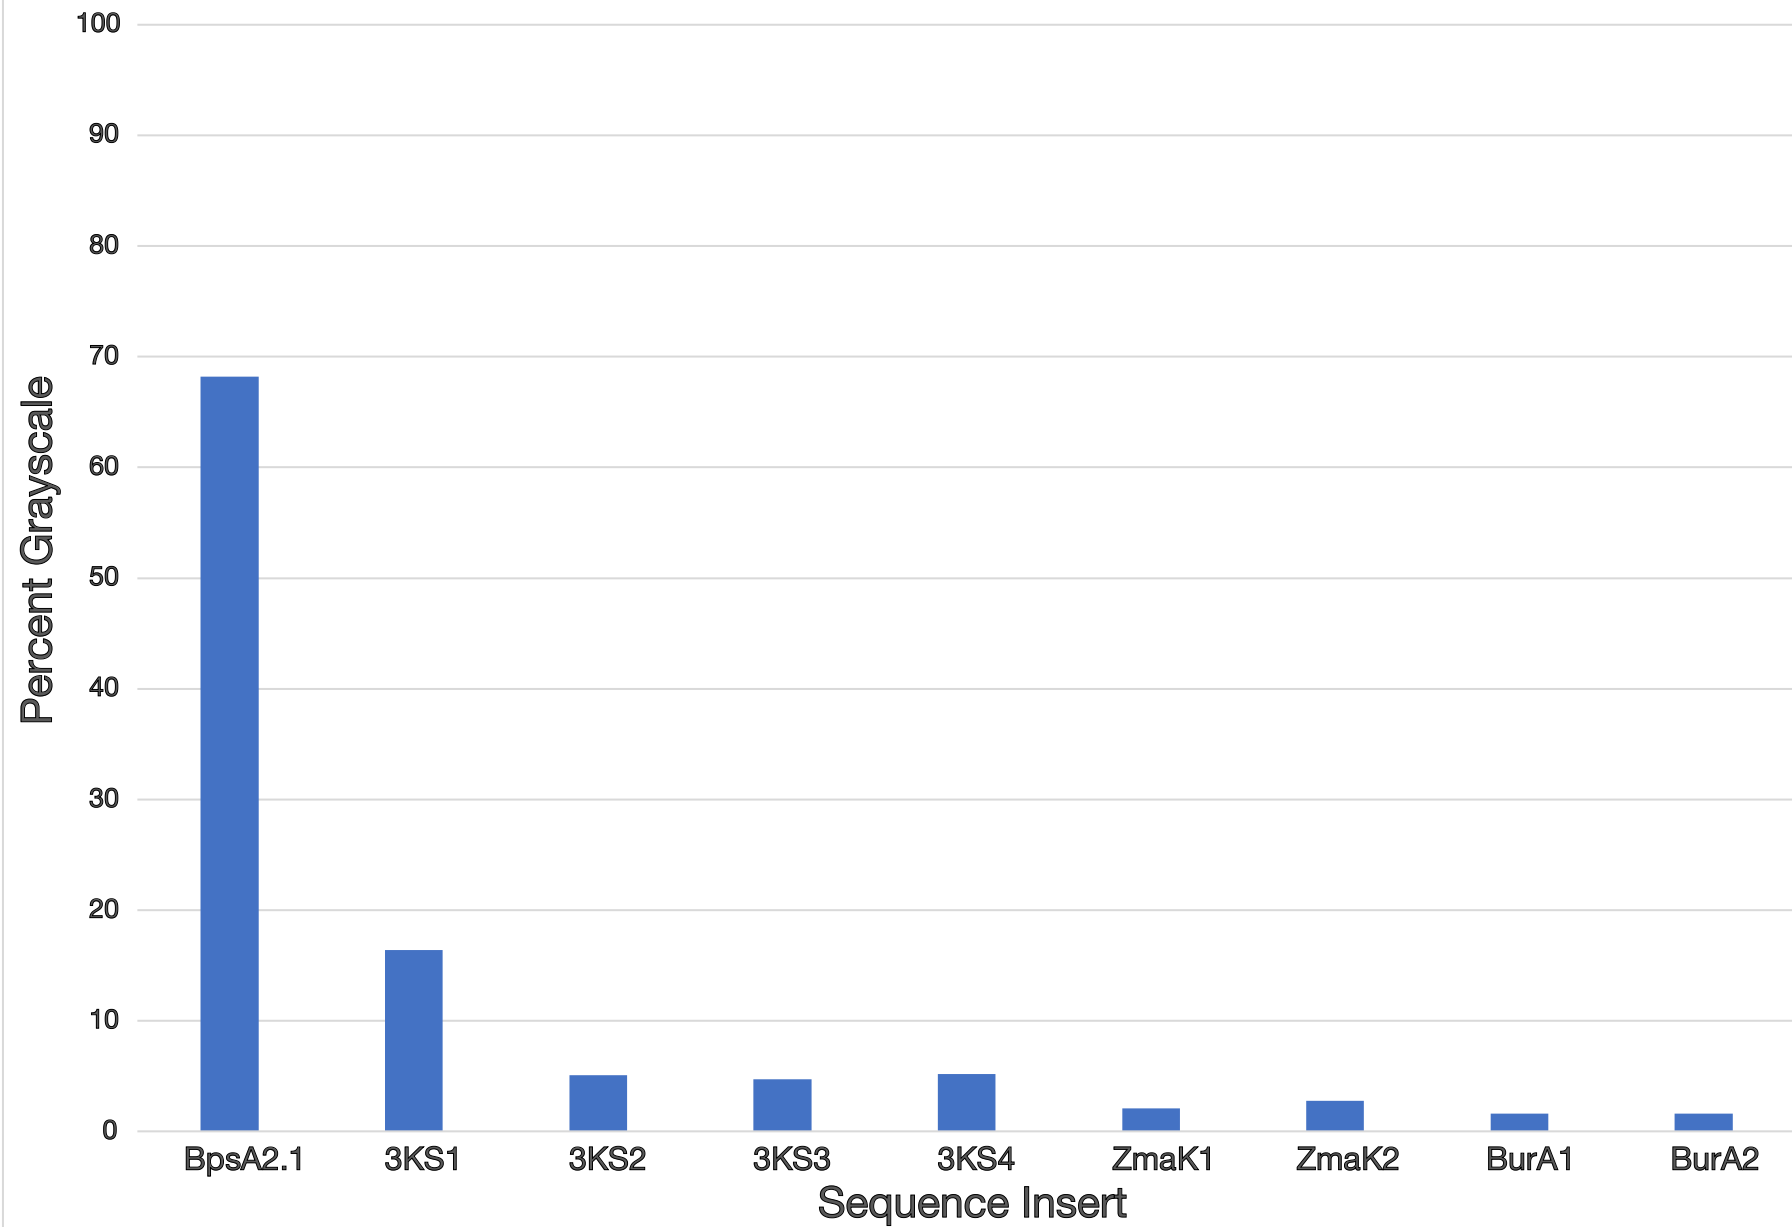

Supplement: s1 [file s1]
